# Detection of Parvalbumin, a Common Fish Allergen Gene in Food, by Real-Time Polymerase Chain Reaction

MIN SUN, CHENGZHU LIANG, HONGWEI GAO, CHAO LIN, and MINGJUN DENG

Shandong Entry-Exit Inspection and Quarantine Bureau, Technical Center No. 70, Qutangxia Rd, Qingdao 266002, People's Republic of China

**Fish, as one of the most common causes of IgE-mediated food hypersensitivity, has recently received increasing attention from the food industry and legislative and regulatory agencies. A real-time polymerase chain reaction assay based on TaqMan-MGB probe technology was developed for the detection of parvalbumin, a major fish allergen gene. The assay had a sensitivity up to 5 pg purified fish DNA and had no cross-reaction with other species, such as cattle, sheep, swine, chicken, shrimp, lobster, crab, squid, clam, rice, soybean, maize, and potato. The coefficient of variation for both intra- and interexperimental variability demonstrated high reproducibility and accuracy. The assay proved to be a potential tool for the detection and label management of fish allergens in food.**

Fish is one of the most common causes of IgE-mediated food hypersensitivity. For sensitized individuals, contact and ingestion of fish is very dangerous, and can elicit a variety of clinical symptoms, ranging from mild to severe and even death (1, 2). Complete and strict avoidance of the offending food is the only way to prevent these allergic reactions. Many countries, such as the United States, Japan, Canada, Switzerland, Great Britain, and the European Union have implemented food allergen labeling regulations to protect food-allergic consumers. Even with the regulations, mistakes in food labeling and cross-contamination occur from time to time, though not always intentionally (3). Therefore, the development of a rapid, sensitive, and specific method for the detection of fish allergens in food is in demand.

In recent years, researchers have carried out in-depth studies on fish allergens that trigger allergic reactions and have identified parvalbumins as the major allergy-eliciting proteins that are responsible for over 95% of atopic responses. They are small [about 12 kilodaltons (kDa), composed of 108–109 amino acid residues] calcium-binding proteins with a remarkable resistance to thermal, chemical, and enzymatic degradation (4, 5). Parvalbumins are mainly expressed in fish

muscle, and are much lower in the dark muscle than in the white muscle (6). Studies have also shown that parvalbumins are cross-reactive fish allergens, containing most of the fish-specific IgE epitopes (7–9). This study reports a real-time polymerase chain reaction (PCR)-based assay using the parvalbumin-specific primers and probe that enable the detection of fish allergens in food.

## Experimental

### *Samples*

Specimens of 30 fish species were included in our study, which comprised 30 genera in 22 families (Table 1). Fish allergen-free samples, such as soybean, rice, maize, beef, chicken, pork, mutton, squid, oyster, clams, scallops, shrimp, crab, and lobster, were used for the analysis of assay specificity. Most of the fish specimens were samples from the trading companies for exit-entry inspection and quarantine; others and reference materials were purchased in local supermarkets in Qingdao, China.

### *DNA Extraction*

For DNA preparation of plant samples, the commercial kit (Jiemen Biotech Co., Shanghai, China) was used according to the manufacturer's instruction. For animal samples, the DNA extraction protocol was modified to extend the Proteinase K digestion at 56°C. Briefly, 10 g sample was weighed out and finely ground with a grinder. Subsequently, 100 mg of fine particulates was lysed not only with lysis buffer but also with Proteinase K until no tissue was visible. Phenol–chloroform extraction was then performed. After centrifugation, the upper aqueous phase was transferred into a new tube, and buffer that was provided with the kit was added to precipitate DNA. The resulting DNA pellet was dissolved and applied to the silica column. The column was washed twice with washing buffer, and the DNA was eluted with elution buffer. The purity and concentration of DNA were determined by measuring the absorption at 260 and 280 nm. After UV quantification, the concentration of each DNA sample was adjusted to 10 ng/μL.

**Table 1. Names and categories of fish samples studied**

| Common name            | Scientific name              | Category                                         |
|------------------------|------------------------------|--------------------------------------------------|
| Blue whiting           | Micromesistius poutassou     | Gadiformes, Gadidae, Micromesistius              |
| Pacific cod            | Gadus macrocephalus          | Gadiformes, Gadidae, Gadus                       |
| Alaska Pollock         | Theragra chalcogramma        | Gadiformes, Gadidae, Theragra                    |
| Haddock                | Melanogrammus aeglefinus     | Gadiformes, Gadidae, Melanogrammus               |
| Saithe                 | Pollachius virens            | Gadiformes, Gadidae, Pollachius                  |
| Southernhake           | Muraenolepis microps         | Gadiformes, Muraenolepididae, Muraenolepis       |
| Pacific hake           | Merluccius productus         | Gadiformes, Melanonidae, Merluccius              |
| Hoki                   | Hymenocephalus striatissimus | Gadiformes, Macrouridae, Hymenocephalus          |
| Grass carp             | Ctenopharyngodon idellus     | Cypriniforms, Cyprinidae, Ctenopharyngodon       |
| Crucian                | Carassius auratus            | Cypriniforms, Cyprinidae, Carassius              |
| Carp                   | Cyprinus carpio              | Cypriniforms, Cyprinidae, Cyprinus               |
| Bighead carp           | Aristichthys nobilis         | Cypriniforms, Cyprinidae, Aristichthys           |
| Small yellow croaker   | Pseudosciaena polyactis      | Perciformes, Sciaenidae, Larimichthys            |
| Red fish               | Sciaenops ocellatus          | Perciformes, Sciaenidae, Sciaenops               |
| Belt fish              | Trichiurus haumela           | Perciformes, Trichiuridae, Trichiurus            |
| Surfperch              | Ditrema temmincki            | Perciformes, Embiotocidae, Ditrema               |
| Red seabream           | Pagrosomus major             | Perciformes, Sparidae, Pagrosomus                |
| Silvery pomfret        | Pampus argenteus             | Perciformes, Stromateidae, Pampus                |
| Stamp                  | Trachurus japonicus          | Perciformes, Carangidae, Trachurus               |
| Sea perch              | Lateolabrax japonicus        | Perciformes, Serranidae, Lateolabrax             |
| Mackerel               | Scomber scombrus             | Perciformes, Scombridae, Scomber                 |
| Yellowfin tuna         | Thunnus albacares            | Perciformes, Thunnidae, Thunnus                  |
| Golden threadfin bream | Nemipterus virgatus          | Perciformes, Nemipteridae, Nemipterus            |
| Olive flounder         | Paralichthys olivaceus       | Pleuronectiformes, Paralichthyidae, Paralichthys |
| Atlantic halibut       | Hippoglossus hippoglossus    | Pleuronectiformes, Pleuronectidae, Hippoglossus  |
| Dory                   | Zeus faber                   | Zeiformes, Zeidae, Zeus                          |
| Greenling              | Hexagrammos otakii           | Scorpaeniformes, Hexagrammidae, Hexagrammos      |
| Alfonsino              | Beryx splendens              | Beryciformes, Berycidae, Beryx                   |
| Big pacific-salmon     | Oncorhynchus keta            | Salmoniformes, Salmonidae, Oncorhynchus          |
| Catfish                | Parasilurus asotus           | Siluriformes, Siluridae, Silurus                 |

### Primers Design

Based on the sequence alignment of the published nucleotide sequences of parvalbumin genes (GenBank Accession Nos. AM497928, AM497927, AB091470, AB211364, AB211365, AB211366, AJ292211, AJ292212, DD137485, and DQ374441), a fish-specific and universal TaqMan probe and primer pair were designed with Primer Express software (Applied Biosystems, Foster City, CA). The forward primer was 5'-CAGGACAAGAGTGGCTTCAT-3'; the reverse primer was 5'GAAGTTCTGCAGGAACAGCTT-3'. The probe was 5'-AGGAGGAYGAGCT-3' (Y was T or G), labeled with a reporter dye (FAM) at the 5' end, and a quencher dye and a minor groove binder (MGB) at the 3' end. These primers and probe were synthesized by ShineGene

Bio-Technologies Inc. (Shanghai, China). The primers were purified by polyacrylamide gel electrophoresis and the probe was purified with high-performance liquid chromatography.

### PCR Amplification

The optimized PCR amplification system had a total volume of 25  $\mu$ L: 1  $\times$  Master Mix, containing HotStarTaq DNA polymerase, MgCl<sub>2</sub>, dNTP (Tiangen Biotech Co. Ltd, Beijing, China), 400 nmol/L each primer, 400 nmol/L probe, and 5  $\mu$ L template DNA. Amplification was performed in an ABI PRISM 7900 (Applied Biosystems), and the PCR program was as follows: predenaturation at 94°C for 2 min; 45 cycles of amplification (94°C for 20 s, 55°C for 20 s, and 68°C for 40 s). Each sample was amplified in triplicate.

**Table 2. Real-time PCR threshold cycle of fish samples studied**

| Sample                 | Mean Ct <sup>a</sup> |
|------------------------|----------------------|
| Blue whiting           | 24.45 ± 0.08         |
| Pacific cod            | 24.36 ± 0.04         |
| Alaska Pollock         | 29.71 ± 0.12         |
| Haddock                | 23.25 ± 0.03         |
| Saithe                 | 24.67 ± 0.13         |
| Southern hake          | 26.25 ± 0.09         |
| Pacific hake           | 29.47 ± 0.13         |
| Hoki                   | 29.29 ± 0.11         |
| Grass carp             | 21.24 ± 0.04         |
| Crucian                | 22.04 ± 0.08         |
| Carp                   | 21.02 ± 0.09         |
| Bighead carp           | 20.79 ± 0.06         |
| Small yellow croaker   | 22.56 ± 0.11         |
| Red fish               | 29.17 ± 0.06         |
| Belt fish              | 24.78 ± 0.1          |
| Surfperch              | 20.06 ± 0.04         |
| Red seabream           | 22.82 ± 0.05         |
| Silvery pomfret        | 27.37 ± 0.09         |
| Stamp                  | 21.85 ± 0.02         |
| Sea perch              | 22.71 ± 0.05         |
| Mackerel               | 27.01 ± 0.12         |
| Golden threadfin bream | ND <sup>b</sup>      |
| Olive flounder         | 30.26 ± 0.07         |
| Atlantic halibut       | 30.16 ± 0.17         |
| Dory                   | 23.74 ± 0.08         |
| Greenling              | 24.99 ± 0.07         |
| Alfonsino              | 25.67 ± 0.04         |
| Big pacific-salmon     | 28.03 ± 0.07         |
| Catfish                | 27.15 ± 0.08         |
| Yellowfin tuna         | ND                   |

<sup>a</sup> 50 ng fish DNA per reaction; Ct, the number of PCR cycles to reach the fluorescence threshold.

<sup>b</sup> ND = Not detected.

## Results and Discussion

### *Applicability of the Assay*

To determine the efficiency of the primers and probe, 30 different fish species were collected. Apart from golden threadfin bream and yellowfin tuna, 28/30 fish species samples yielded positive amplification (Table 2). Interestingly, the dissociation curve of golden threadfin bream showed a single and characteristic melt peak in real-time PCR when SYBR Green I was used. It is reported that the TaqMan-MGB-based assay is much more specific than the

**Table 3. Real-time PCR results of food products studied**

| Food sample      | Fish declaration | PCR result |
|------------------|------------------|------------|
| Fish steak       | +                | +          |
| Fish ball 1      | +                | +          |
| Fish ball 2      | +                | +          |
| Caviar           | +                | +          |
| Sausage 1        | +                | +          |
| Imitation crab   | +                | +          |
| Imitation shrimp | +                | +          |
| Can              | +                | +          |
| Shrimp ball      | M <sup>a</sup>   | +          |
| Sausage 2        | M                | -          |

<sup>a</sup> M = May contain traces of fish.

SYBR Green I-based assay, which can detect a single base difference. Thus, some samples may test negative by the probe-based real-time PCR but positive by the double-stranded DNA-binding dye-based PCR assay, because of base difference in nucleotide sequence between forward and reverse primer. As for yellowfin tuna, our amplification result was consistent with the previous study (10) in which the researchers found that tuna did not contain the parvalbumin protein. An allergen of about 46 kDa in yellowfin tuna, which does not belong to the parvalbumin group, could explain tuna's weak allergenic capacity.

Ten food products were purchased from local supermarkets and tested with parvalbumin-specific primers and probe to further validate the applicability of the assay. Of the 10 products, 9 were found to harbor fish allergens, including one labeled with "may contain traces of fish" (Table 3, Figure 1).

### *Repeatability and Reproducibility of Assay*

In order to evaluate the repeatability and reproducibility of the method, 5 samples at a concentration of 10 ng/μL were randomly chosen as PCR templates, and amplified in triplicate in an experiment and performed 3 times. The results of the TaqMan assay showed that the coefficient of variation values for both intraexperimental and interexperimental ranged from 0.84 to 2.11% and 0.16 to 0.43%, respectively (Table 4). These results suggest that the method has good repeatability and reproducibility.

### *Sensitivity of the Assay*

To determine the applicability of the TaqMan assay, we studied 30 fish species samples. As shown in Table 2, almost all the samples yielded positive amplification. Nevertheless, some samples had various threshold cycles, and even a difference of 10 cycles, though the same amounts of DNA had

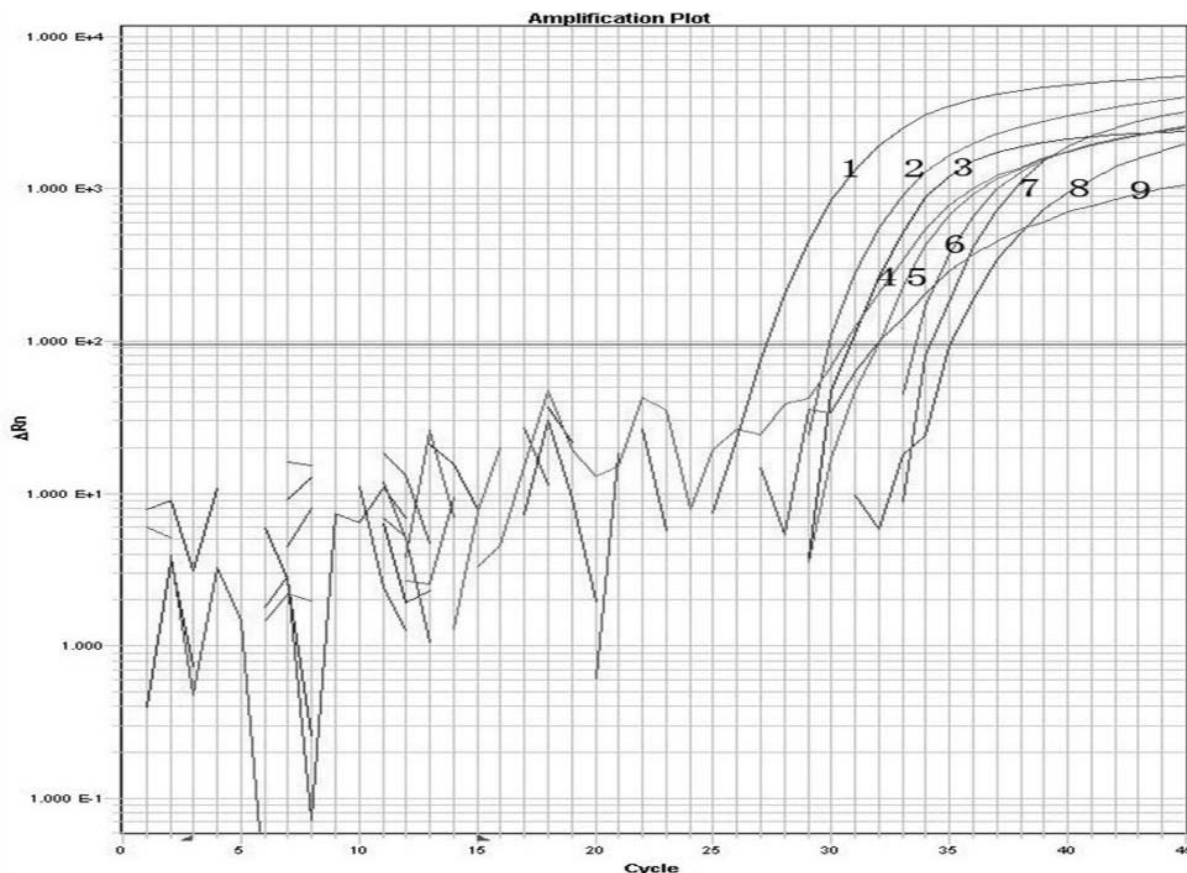

**Figure 1.** Real-time PCR amplification plot of food products: Lane 1, fish ball 2; Lane 2, can; Lane 3, caviar; Lane 4, fish ball 1; Lane 5: imitation crab; Lane 6: fish steak; Lane 7: imitation shrimp; Lane 8: shrimp ball; Lane 9: sausage 1.

been used in the PCR amplification. Surfperch gave the smallest mean threshold cycle (Ct) values (20.06), and olive flounder gave the largest mean Ct values (30.26), indicating that the copy number of gene-coded parvalbumin varied in different fish species. To determine the sensitivity of this method, we serially diluted DNA solution of surfperch and olive flounder with soybean DNA solution, respectively. The results showed that the concentration of 10 pg for surfperch and 5 pg for olive flounder were the lowest DNA

concentrations that yielded reproducible positive results. The linearity was observed when DNA was amplified at concentrations between 10 pg and 100 ng, and 5 pg and 10 ng, respectively (Figures 2 and 3).

#### *Specificity of Assay*

Specificity is always of primary concern. To determine the specificity of the assay, DNA was extracted from beef, mutton, pork, chicken, shrimp, lobster, crab, squid, clam, rice,

**Table 4.** Coefficient of variation values for both intra- and interexperimental of some samples

| Sample         | Interexperimental |       |              |       |              |       |                   |       |
|----------------|-------------------|-------|--------------|-------|--------------|-------|-------------------|-------|
|                | Experiment 1      |       | Experiment 2 |       | Experiment 3 |       | Intraexperimental |       |
|                | Mean Ct           | CV, % | Mean Ct      | CV, % | Mean Ct      | CV, % | Mean Ct           | CV, % |
| Alaska Pollock | 29.71 ± 0.12      | 0.4   | 30.52 ± 0.06 | 0.2   | 30.65 ± 0.1  | 0.33  | 30.29 ± 0.51      | 1.65  |
| Dory           | 23.74 ± 0.08      | 0.34  | 23.83 ± 0.04 | 0.17  | 24.13 ± 0.07 | 0.29  | 23.9 ± 0.2        | 0.84  |
| Greenling      | 24.99 ± 0.07      | 0.28  | 25.87 ± 0.06 | 0.23  | 25.56 ± 0.11 | 0.43  | 25.47 ± 0.45      | 1.77  |
| Alfonsino      | 25.67 ± 0.04      | 0.16  | 25.44 ± 0.09 | 0.35  | 26.15 ± 0.07 | 0.27  | 25.75 ± 0.36      | 1.4   |
| Striped barb   | 27.37 ± 0.09      | 0.33  | 28.15 ± 0.07 | 0.25  | 28.53 ± 0.05 | 0.18  | 28.02 ± 0.59      | 2.11  |

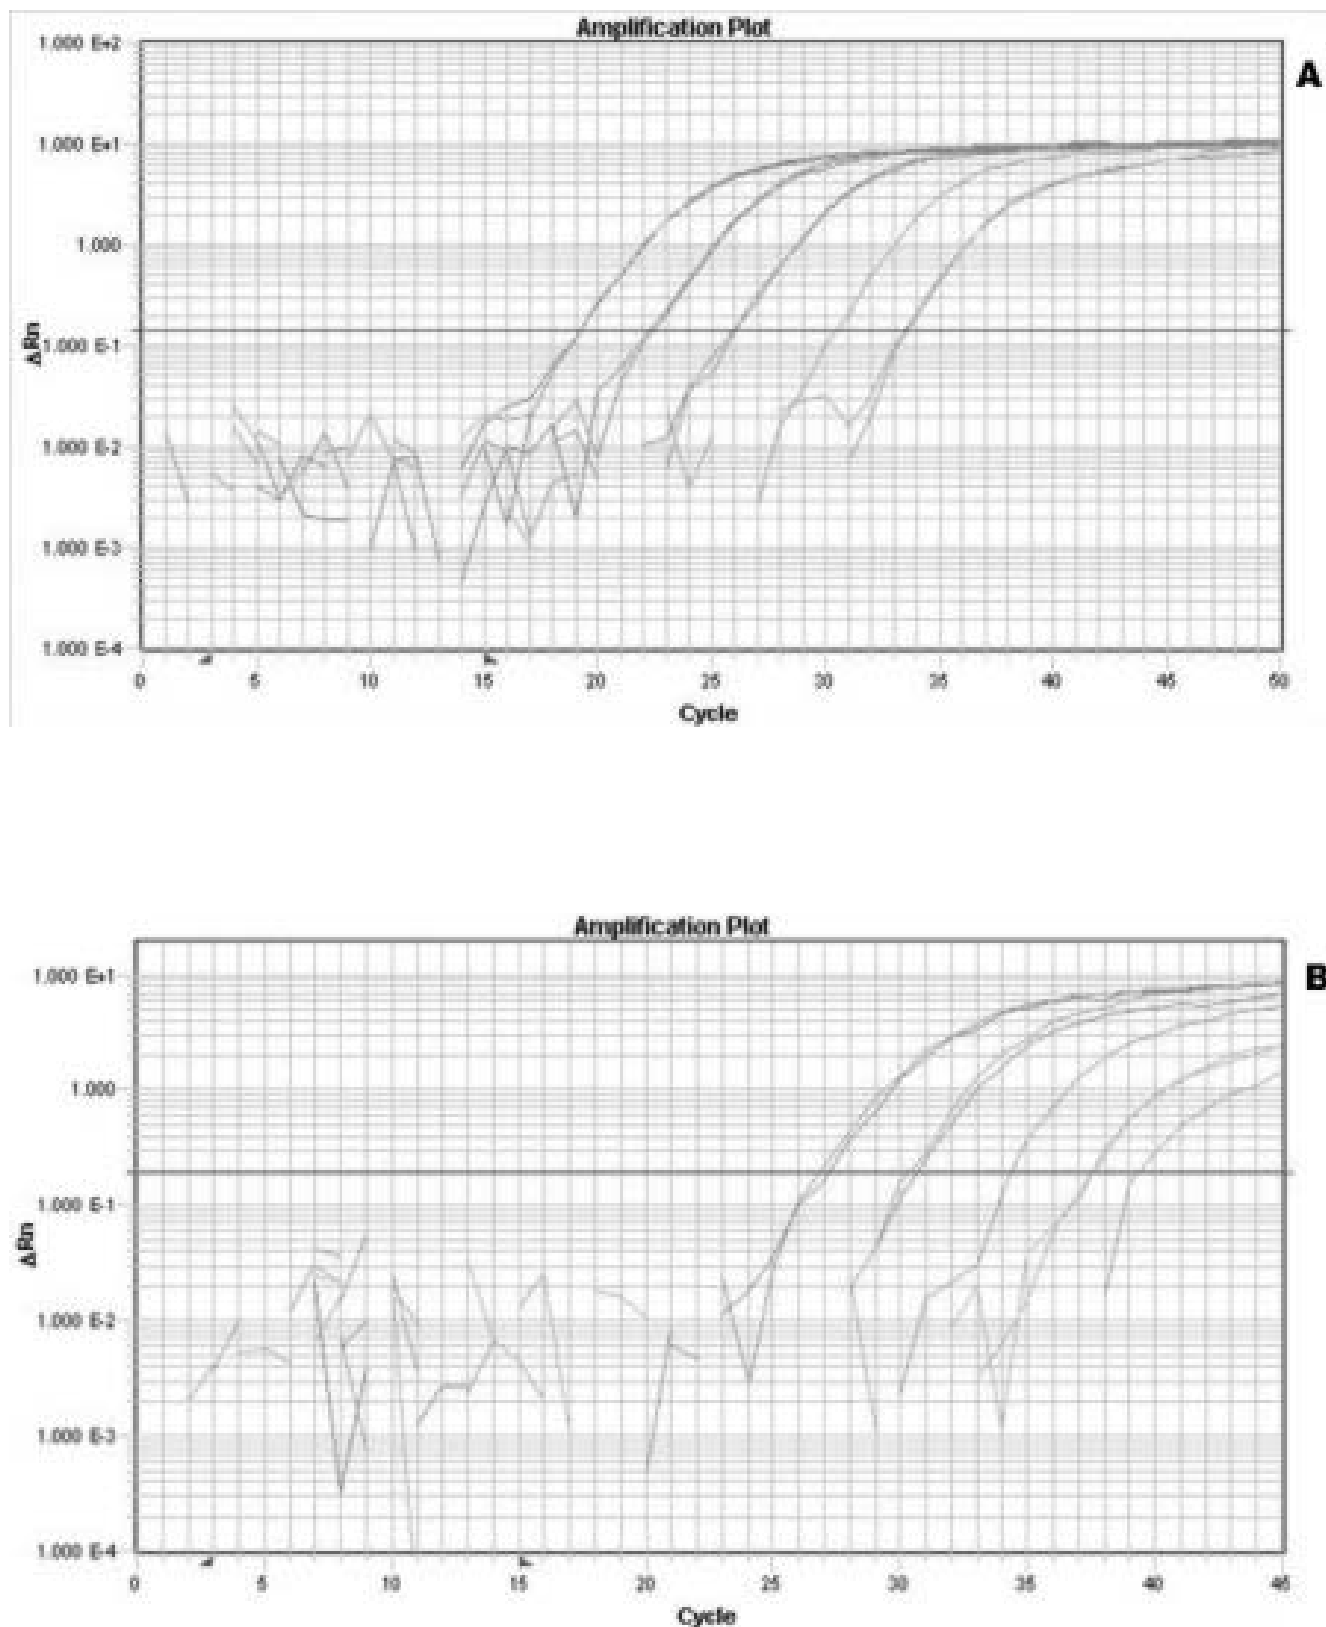

Figure 2. Real-time PCR amplification plot of serial dilution of fish DNA. Amplification plot generated by 5 concentrations of (A) surfperch DNA (100, 10, and 1 ng; and 100 and 10 pg); (B) olive flounder DNA (10 and 1 ng; and 100, 10, and 5 pg).

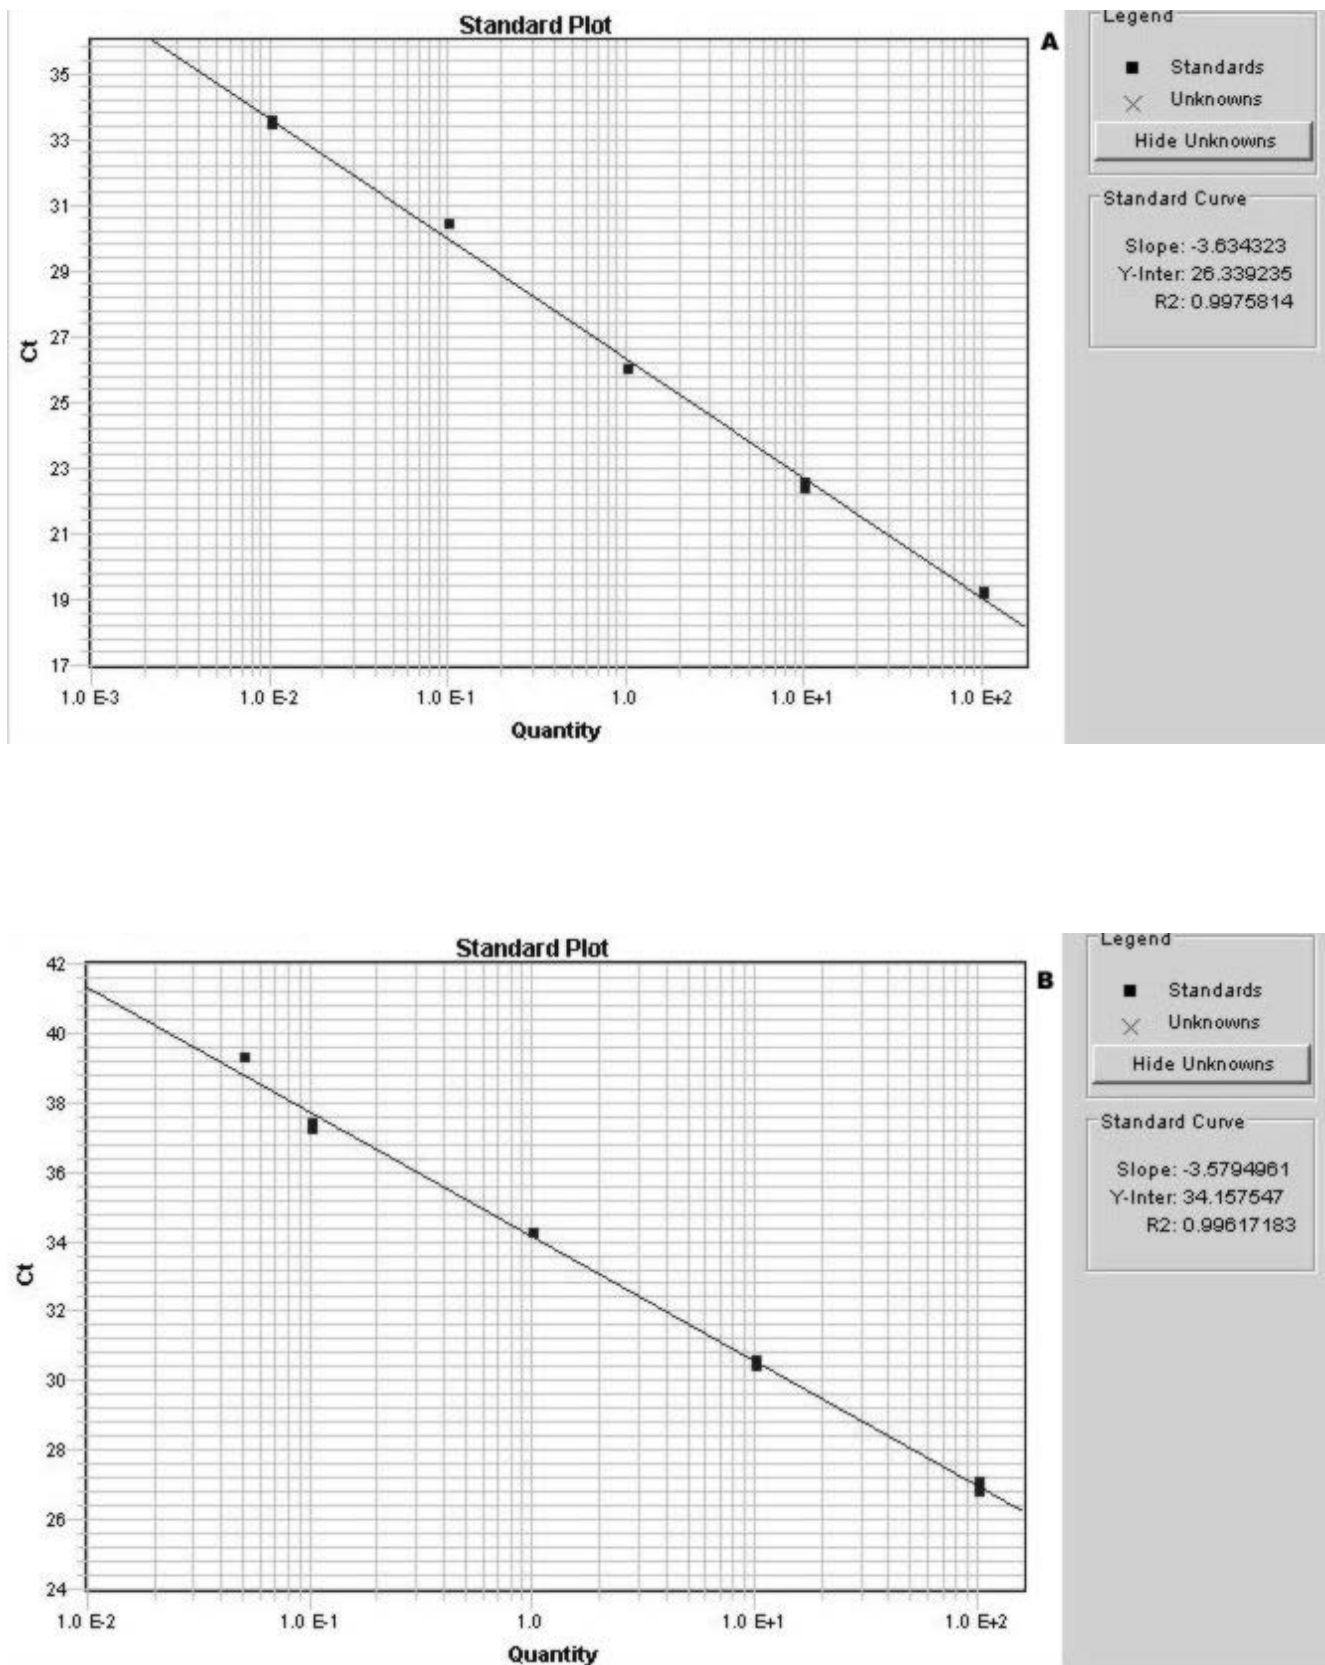

Figure 3. Standard plot of fish samples: (A) Surfperch, (B) olive flounder.

soybean, maize, and potato, and then amplified with parvalbumin-specific primers and the TaqMan-MGB probe. As expected, no typical amplification curves were observed, which demonstrated that primers and probe had no cross-reactions with these species.

The problem of allergens in food has received increasing attention. The routine methods for the detection of food allergens involve enzyme-linked immunosorbent assay and PCR. The former is a protein-based method and the latter is a method operating on the DNA level. Because of changes of protein structure in food processing, and the possibility that the special food matrix will affect the performance of the protein-based assay, the PCR assays are more desirable for processed products. PCR test kits for fish allergens are now commercially available. However, almost all of them focus on the identification of fish ingredient by targeting the cytochrome b or 5S RNA gene. In this study, we chose parvalbumin as the marker of real-time PCR. The detection of parvalbumin gene showed a higher precision in indicating the presence of fish allergens to some extent. The amplification product was only 56 base pairs, which made it a favorable method for processed foods, taking into account the degradation of DNA in processing (11).

Studies have shown that allergic reactions to food are highly individual; in other words, there is enormous variation in the sensitivity and severity levels among allergen-sensitive individuals. For some hypersensitive patients, even trace amounts can elicit life-threatening allergic reactions. It is difficult to determine safe doses of allergens (i.e., thresholds), which has been a challenge to researchers. In our study, the same number of fish samples was confirmed to be different in copy numbers of the parvalbumin gene. Among 30 fish species included, the copy number of olive flounder was the lowest. However, even trace olive flounder (5 pg) can be detected with the developed method. This suggests that it is feasible to use the parvalbumin gene segment as a detection marker of fish allergen, and the developed real-time PCR method is a potential tool for the detection and label management of fish allergen in food.

In contrast to the rich variety of fish, our data are still spare. Further research is needed to confirm the applicability of this

method for additional fish species and determine the relationship between the copy numbers of parvalbumin and allergenicity.

### Acknowledgments

This work was supported by grants No. 10-46(2007GYJ036) from General Administration of Quality Supervision, Inspection and Quarantine of the PRC, and No. SK200758 from Shandong Entry-Exit Inspection and Quarantine Bureau. We are grateful to Taiji Chen from Southeast University and Xinming Tu from Peking Union Medical College, Tsinghua University, for reviewing the manuscript.

### References

- (1) Bugajska-Schretter, A., Pastore, A., Vangelista, L., Rumpold, H., Valenta, R., & Spitzauer, S. (1999) *Int. Arch. Allergy Immunol.* **118**, 306–308
- (2) Swoboda, I., Bugajska-Schretter, A., Verdino, P., Keller, W., Sperr, W.R., Valent, P., Valenta, R., & Spitzauer, S. (2002) *J. Immunol.* **168**, 4576–4584
- (3) Anibarro, B., Seoane, F.J., & Mugica, M.V. (2007) *J. Invest. Allergol. Clin. Immunol.* **17**, 168–172
- (4) Swoboda, I., Bugajska-Schretter, A., Valenta, R., & Spitzauer, S. (2002) *Allergy* **72**, 94–96
- (5) Bugajska-Schretter, A., Grote, M., Vangelista, L., Valent, P., Sperr, W.R., Rumpold, H., Pastore, A., Reichelt, R., Valenta, R., & Spitzauer, S. (2000) *Gut* **46**, 661–669
- (6) Kobayashi, A., Tanaka, H., Hamada, Y., Ishizaki, S., Nagashima, Y., & Shiomi, K. (2006) *Allergy* **61**, 357–363
- (7) Hansen, T.K., Bindslev-Jensen, C., Skov, P.S., & Poulsen, L.K. (1997) *Ann. Allergy Asthma Immunol.* **78**, 187–194
- (8) Helbling, A., Haydel, R. Jr, McCants, M.L., Musmand, J.J., El-Dahr, J., & Lehrer, S.B. (1999) *Ann. Allergy Asthma Immunol.* **83**, 517–523
- (9) Wild, L.G., & Lehrer, S.B. (2005) *Curr. Allergy Asthma Rep.* **5**, 74–79
- (10) Van Do, T., Elsayed, S., Florvaag, E., Hordvik, I., & Endresen, C. (2005) *J. Allergy Clin. Immunol.* **116**, 1314–1320
- (11) Lahiff, S., Glennon, M., O'Brien, L., Smith, T., Maher, M., & Shilton, N. (2001) *Mol. Cell Probes* **15**, 27–35
